# Supplementary material for: Syntheses, structures, and properties of multidimensional lithium coordination polymers based on aliphatic carboxylic acids
Source: Royal Society of Chemistry journal article supplement (doi:10.1039/c2dt32424e), 2012-11-28
Supplement: c2dt32424e.pdf [file c2dt32424e.pdf]

# Supporting Information File

## Syntheses, structures, and properties of multidimensional lithium coordination polymers based on aliphatic carboxylic acids

Pei-Chi Cheng,<sup>a</sup> Wei-Cheng Lin,<sup>a</sup> Feng-Shuen Tseng,<sup>a</sup> Ching-Che Kao,<sup>a</sup> Ting-Guang Chang,<sup>a</sup>  
Duraisamy Senthil Raja,<sup>a</sup> Wei-Ren Liu,<sup>\*b</sup> and Chia-Her Lin<sup>\*a</sup>

<sup>a</sup>*Department of Chemistry, Chung-Yuan Christian University, Chungli 320, Taiwan;* <sup>b</sup>*Department of Chemical Engineering, Chung-Yuan Christian University, Chungli 320, Taiwan*

Figure S1. Powder XRD patterns of **1**.

Figure S2. Powder XRD patterns of **2**.

Figure S3. Powder XRD patterns of **3**.

Figure S4. Varied temperature powder X-ray patterns of compound **2**.

Figure S5. FT-IR spectra of **1–3**.

Figure S6. The diagrams of H-bonding interactions of **2**.

Figure S7. The diagrams of H-bonding interactions of **3**.

Figure S8. Cyclic voltammogram of ligands in 1M LiPF<sub>6</sub> EC/DMC (1:1 V/V), which was recorded in three cycles at a scanning rate of 1 mVs<sup>-1</sup>.

Figure S9. Scanning electron micrographs for **1-3**.

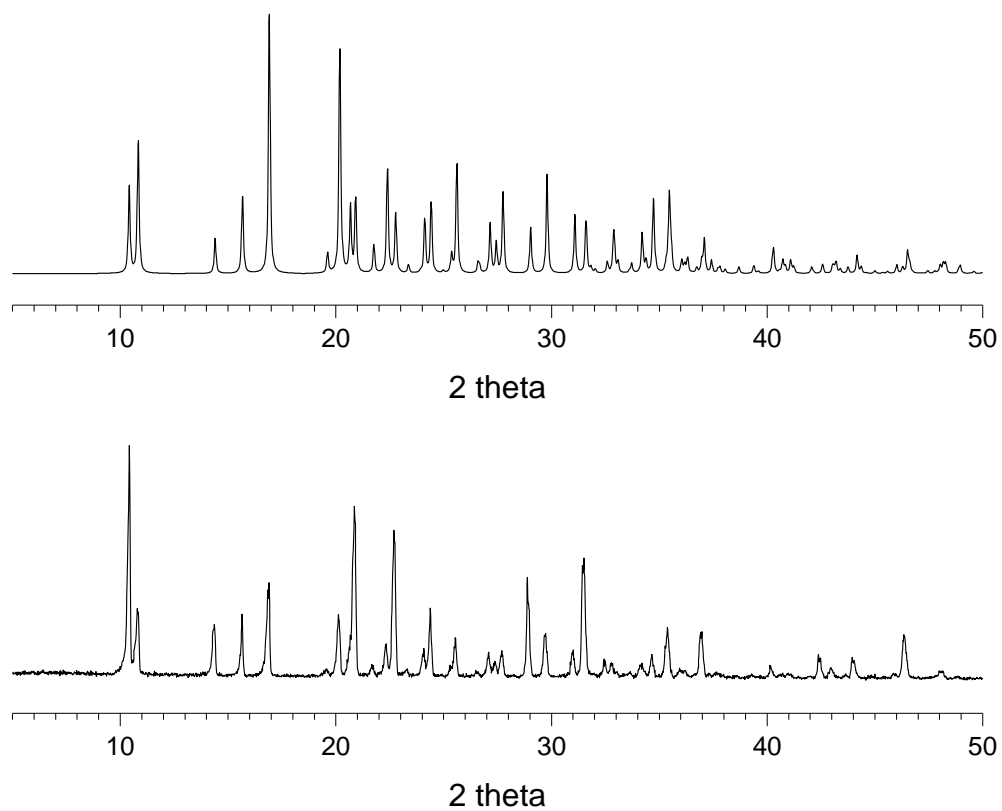

**Figure S1.** Powder XRD patterns of **1** (calculated, top; measured, bottom).

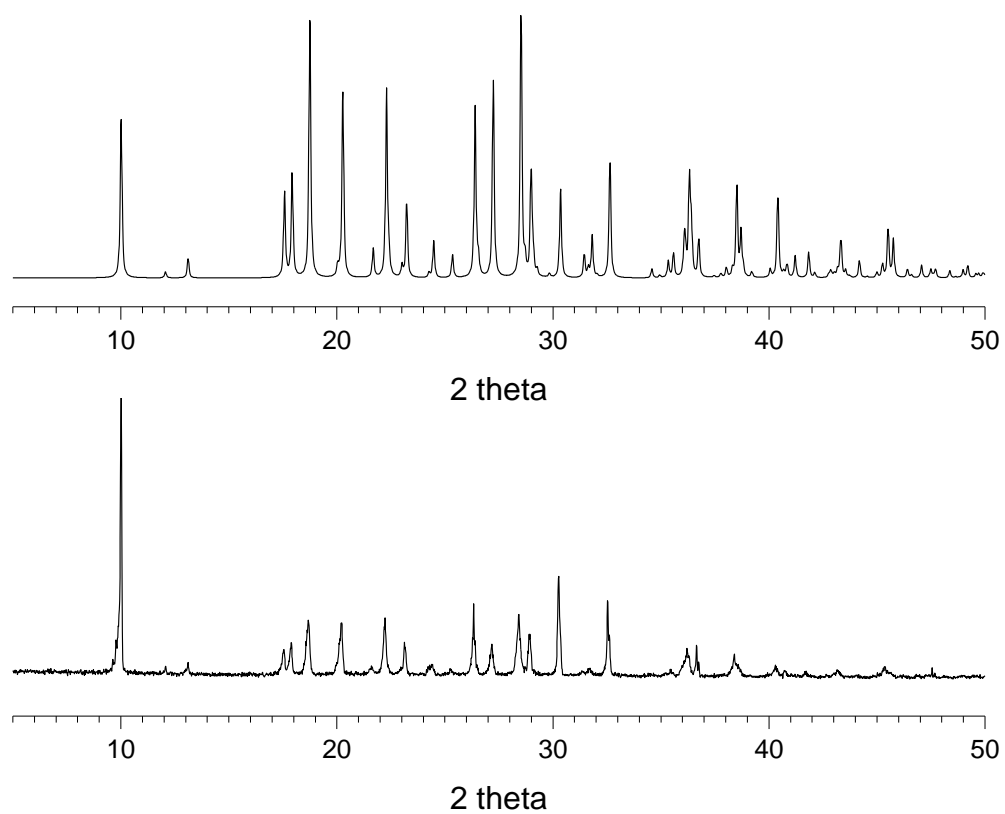

**Figure S2.** Powder XRD patterns of **2** (calculated, top; measured, bottom).

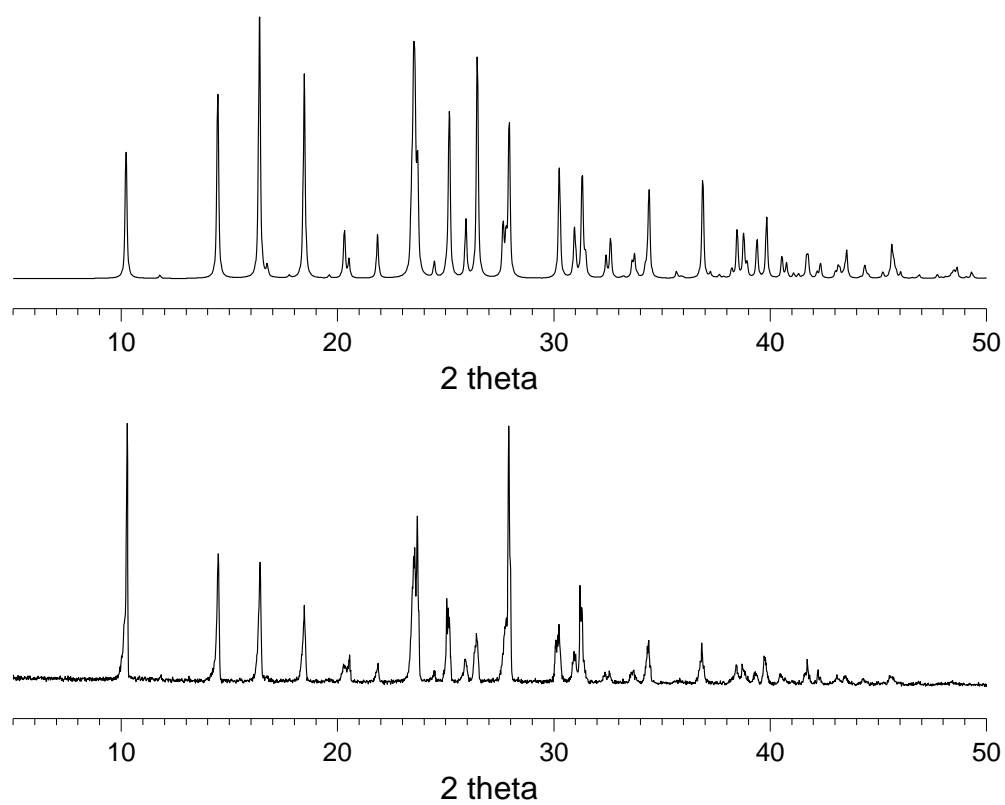

**Figure S3.** Powder XRD patterns of **3** (calculated, top; measured, bottom).

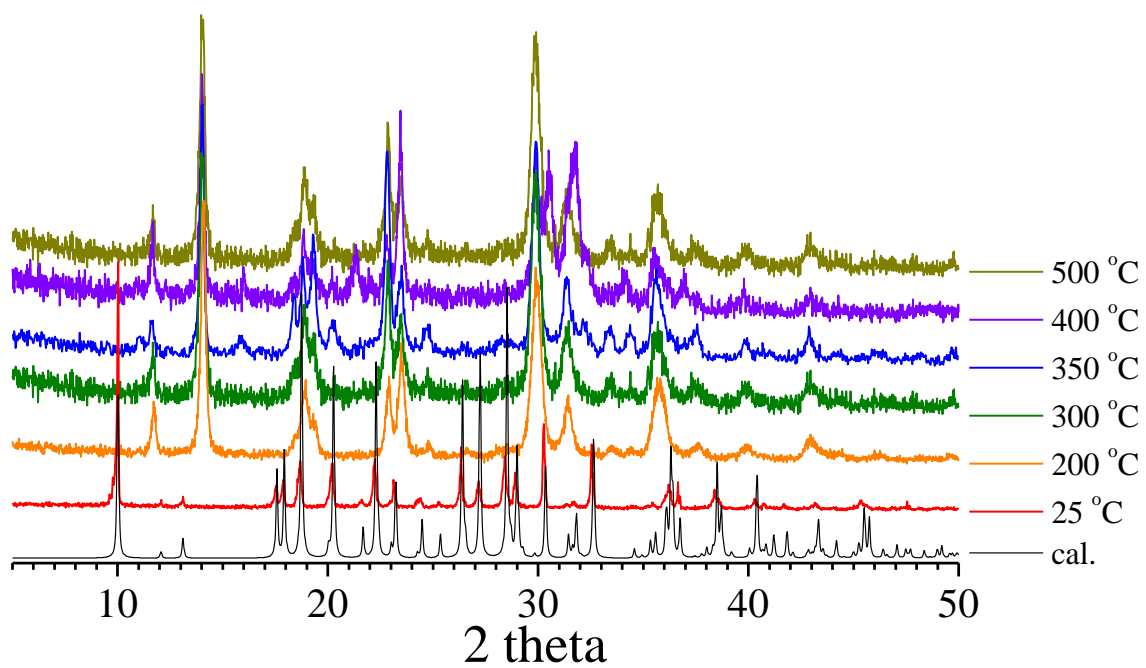

**Figure S4.** Varied temperature powder X-ray patterns of compound 2.

(a) Compound 1

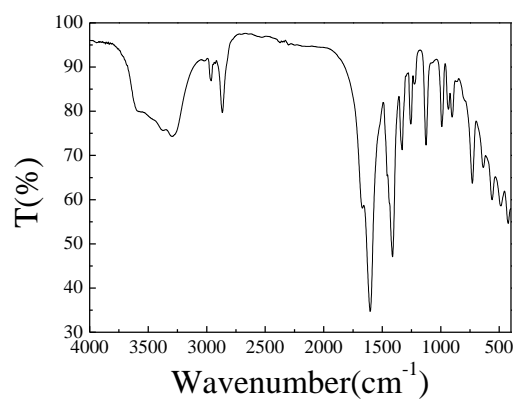

(b) Compound 2

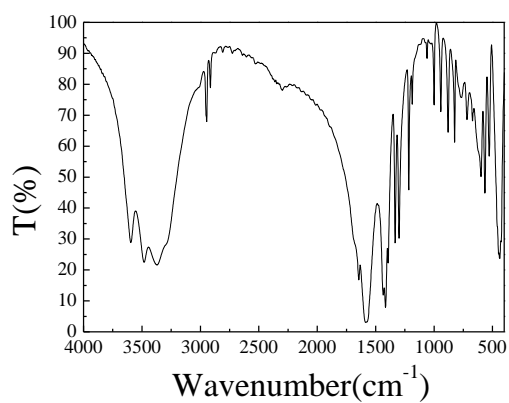

(c) Compound 3

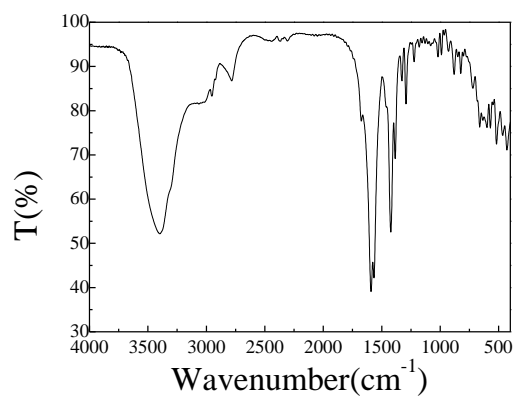

**Figure S5.** FT-IR spectra of 1–3.

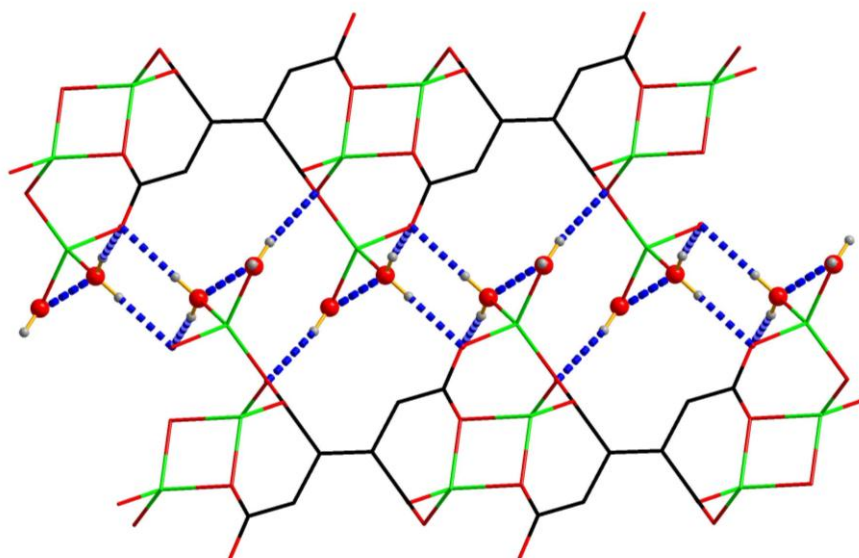

**Figure S6.** The diagrams of H-bonding interactions of **2**.

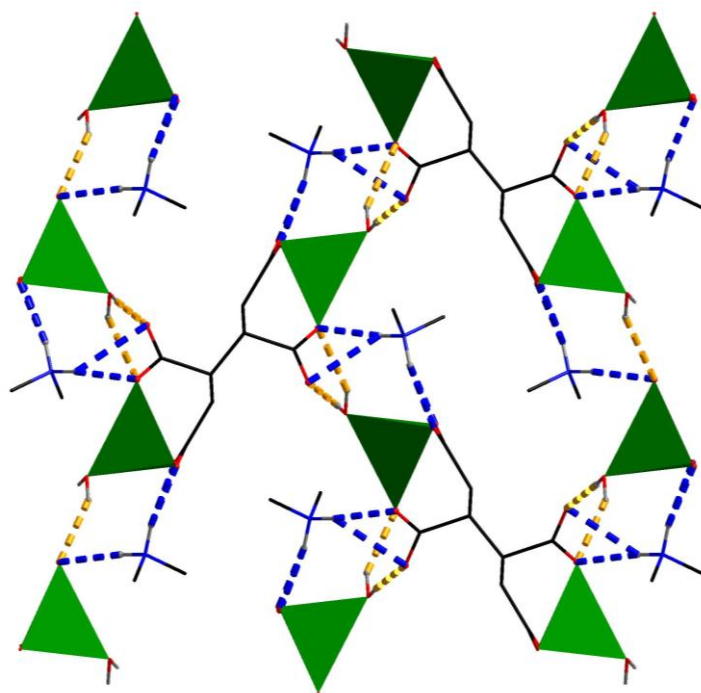

**Figure S7.** The diagrams of H-bonding interactions of **3**.



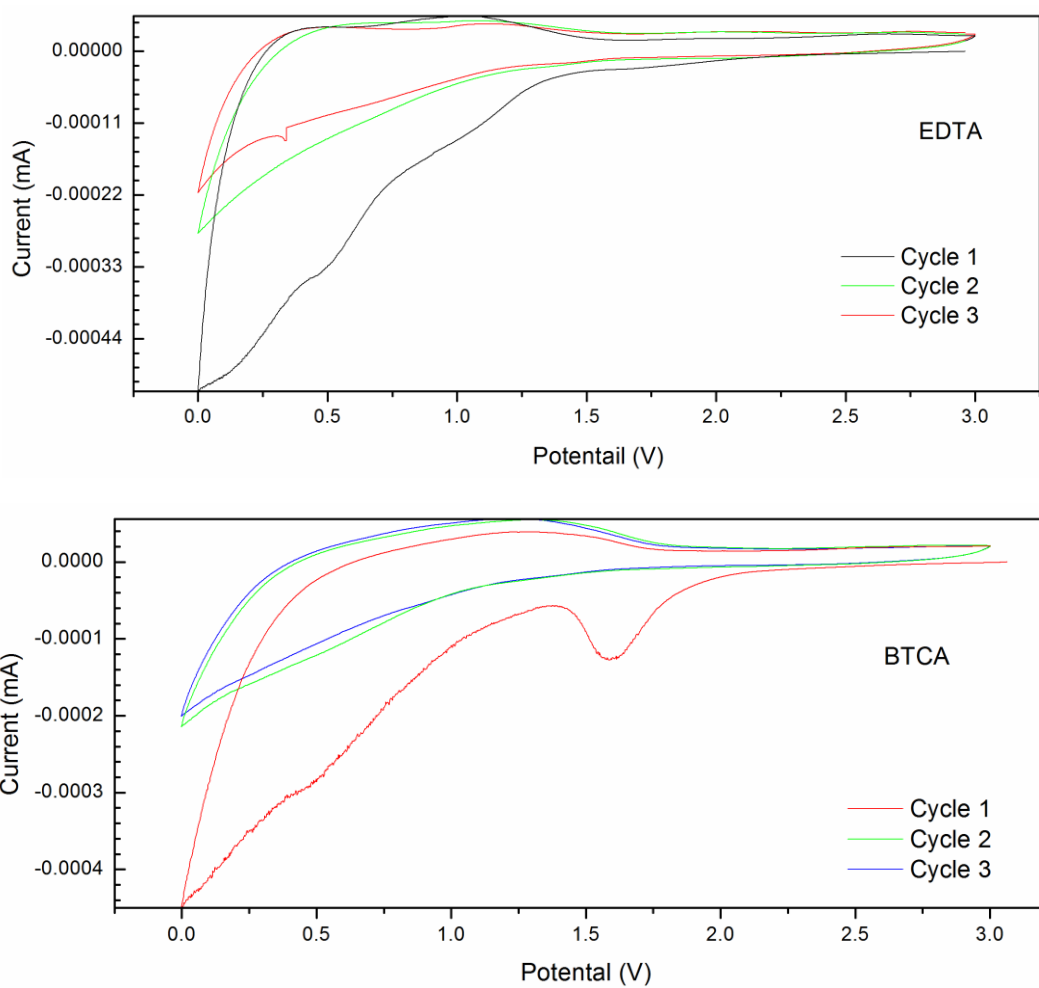

**Figure S8.** Cyclic voltammogram of ligands in 1M LiPF<sub>6</sub> EC/DMC (1:1 V/V), which was recorded in three cycles at a scanning rate of 1 mVs<sup>-1</sup>.

### Complex 1

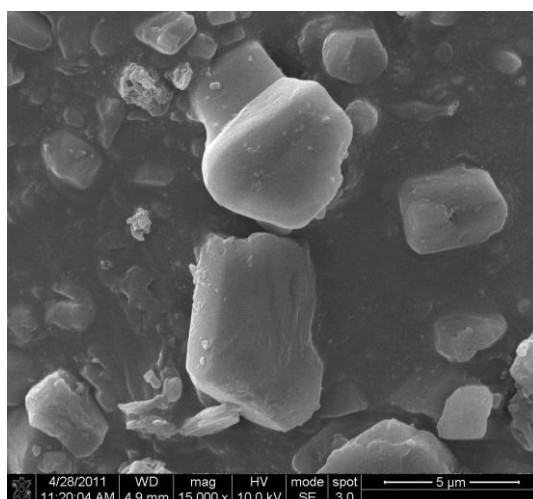

### Complex 2

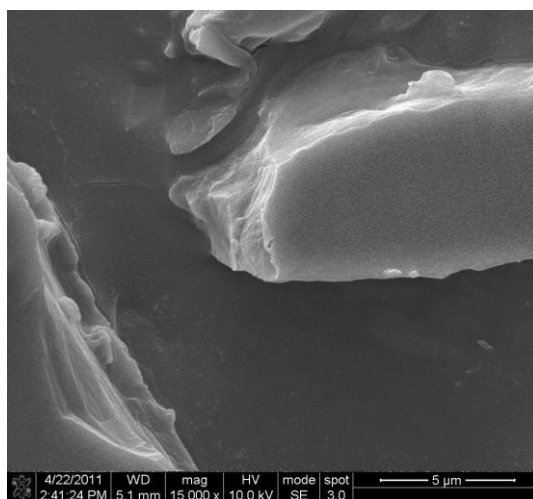

### Complex 3

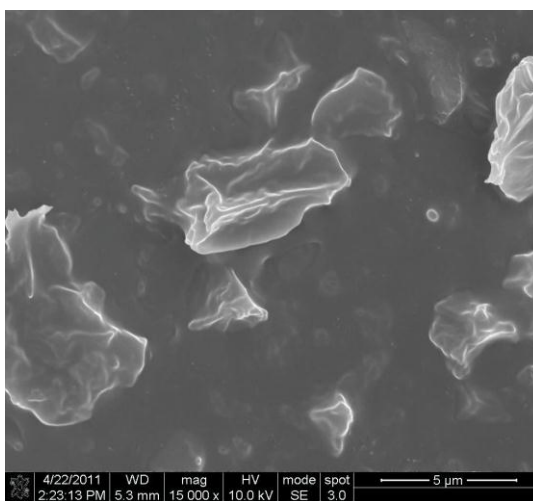

**Figure S9.** Scanning electron micrographs for 1-3.
